# Supplementary material for: Dopamine Therapy and the Regulation of Oxidative Stress and Mitochondrial DNA Copy Number in Patients with Parkinson’s Disease
Source: PubMed Central journal article supplement (PMC7699910; doi:10.3390/antiox9111159), 2020-11-20
Supplement: antioxidants-09-01159-s001.pdf [file antioxidants-09-01159-s001.pdf]

Supplemental Table 1. A bivariate correlative study identifies some relationships between these identified PD-related biomarkers

|                 |                     | Parkinson dis. | Age     | Sex     | BMI     | TBARS   | Thiols  | Log_ΔCt copy no |
|-----------------|---------------------|----------------|---------|---------|---------|---------|---------|-----------------|
| Parkinson dis.  | Pearson Correlation | 1              | .042    | .005    | -.087** | .163**  | -.093** | -.160**         |
|                 | Sig. (2-tailed)     |                | .109    | .861    | .005    | .000    | .000    | .000            |
|                 | N                   | 1469           | 1468    | 1469    | 1032    | 1430    | 1469    | 1448            |
| Age             | Pearson Correlation | .042           | 1       | -.075** | -.099** | .042    | -.306** | -.127**         |
|                 | Sig. (2-tailed)     | .109           |         | .004    | .001    | .112    | .000    | .000            |
|                 | N                   | 1468           | 1468    | 1468    | 1032    | 1429    | 1468    | 1447            |
| Sex             | Pearson Correlation | .005           | -.075** | 1       | -.010   | .051    | .045    | -.056*          |
|                 | Sig. (2-tailed)     | .861           | .004    |         | .757    | .053    | .087    | .032            |
|                 | N                   | 1469           | 1468    | 1469    | 1032    | 1430    | 1469    | 1448            |
| BMI             | Pearson Correlation | -.087**        | -.099** | -.010   | 1       | .042    | .011    | .000            |
|                 | Sig. (2-tailed)     | .005           | .001    | .757    |         | .184    | .718    | .995            |
|                 | N                   | 1032           | 1032    | 1032    | 1032    | 1008    | 1032    | 1020            |
| TBARS           | Pearson Correlation | .163**         | .042    | .051    | .042    | 1       | -.082** | -.047           |
|                 | Sig. (2-tailed)     | .000           | .112    | .053    | .184    |         | .002    | .080            |
|                 | N                   | 1430           | 1429    | 1430    | 1008    | 1430    | 1430    | 1409            |
| Thiols          | Pearson Correlation | -.093**        | -.306** | .045    | .011    | -.082** | 1       | .063*           |
|                 | Sig. (2-tailed)     | .000           | .000    | .087    | .718    | .002    |         | .016            |
|                 | N                   | 1469           | 1468    | 1469    | 1032    | 1430    | 1469    | 1448            |
| Log_ΔCt copy no | Pearson Correlation | -.160**        | -.127** | -.056*  | .000    | -.047   | .063*   | 1               |
|                 | Sig. (2-tailed)     | .000           | .000    | .032    | .995    | .080    | .016    |                 |
|                 | N                   | 1448           | 1447    | 1448    | 1020    | 1409    | 1448    | 1448            |

\*\* . Correlation is significant at the 0.01 level (2-tailed).

\* . Correlation is significant at the 0.05 level (2-tailed).
